# Supplementary material for: Oxygen Tension Strongly Influences Metabolic Parameters and the Release of Interleukin-6 of Human Amniotic Mesenchymal Stromal CellsIn Vitro
Source: Hindawi journal article supplement (doi:10.1155/2018/9502451), 2018-10-28
Supplement: f1 [file 9502451.f1.pdf]

**Supplementary Table 1. Oligonucleotide sequences of quantitative PCR and digital PCR**

| Gene          | Accession number of NCBI  | Oligonucleotide sequence (5' to 3')       | Size (nucleotides) | T <sub>m</sub> (°C) | Length of amplicon (base pairs) | Assay reference (PubMed ID) |
|---------------|---------------------------|-------------------------------------------|--------------------|---------------------|---------------------------------|-----------------------------|
| <i>MYC</i>    | NG_007161.2<br>AY214166.1 | F: GCCAGAGGAGGAACGAGCT                    | 19                 | 58                  | 81                              | 11472550                    |
|               |                           | R: GGGCCTTTTCATTGTTTCCA                   | 21                 | 60                  |                                 |                             |
|               |                           | P: FAM-TGCCCTGCGTGACCAGATCC-BHQ1          | 20                 | 65                  |                                 |                             |
| <i>MT-ND1</i> | NC_012920.1               | F: CCCTAAAACCCGCCACATC                    | 19                 | 59                  | 68                              | this study                  |
|               |                           | R: AGCGATGGTGAGAGCTAAGGTC                 | 22                 | 59                  |                                 |                             |
|               |                           | P: FAM-CCATCACCC-ZEN-TCTACATCACCGCCC-IBFQ | 24                 | 68                  |                                 |                             |

T<sub>m</sub>: melting temperature of Primer Express 2.0 software (Applied Biosystems, Foster City, USA) under default settings, F and R: forward and reverse amplification primers, P: sequence of fluorogenic hydrolysis probe, FAM: 6-carboxyfluorescein, BHQ1: Black Hole Quencher 1 (BHQ-1<sup>\*</sup>), ZEN: ZEN<sup>™</sup> internal quencher, IBFQ: Iowa Black<sup>®</sup> fluorescent quencher

## Supplementary Figure 1

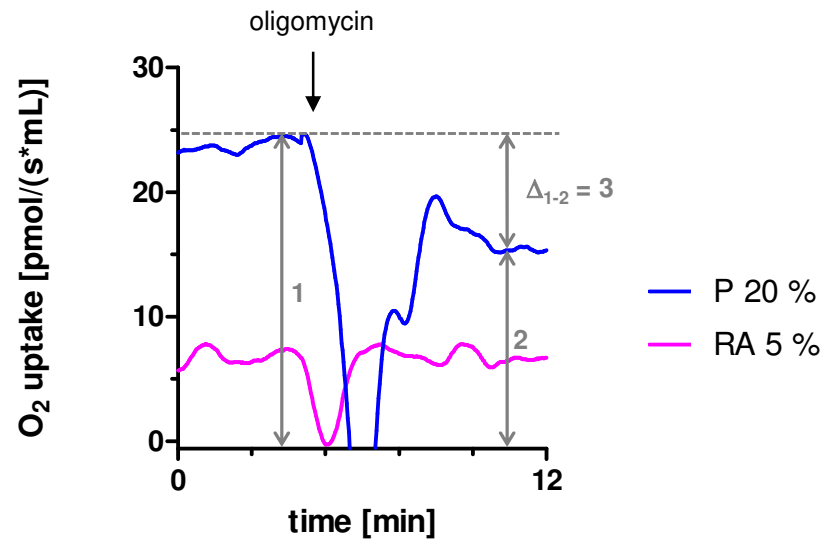

**Supplementary Figure 1. Mitochondrial activity measurement.** Representative oxygen consumption trace of placental hAMSCs incubated for 4 days at 20 % oxygen (P, blue), and reflected hAMSCs incubated for 4 days at 5 % oxygen (RA, magenta). 1 = ROUTINE respiration, 2 = LEAK, 3 ( $\Delta_{1-2}$ ) = phosphorylation-related respiration. Abbreviations: hAMSCs, human amniotic mesenchymal stromal cells.

## Supplementary Figure 2

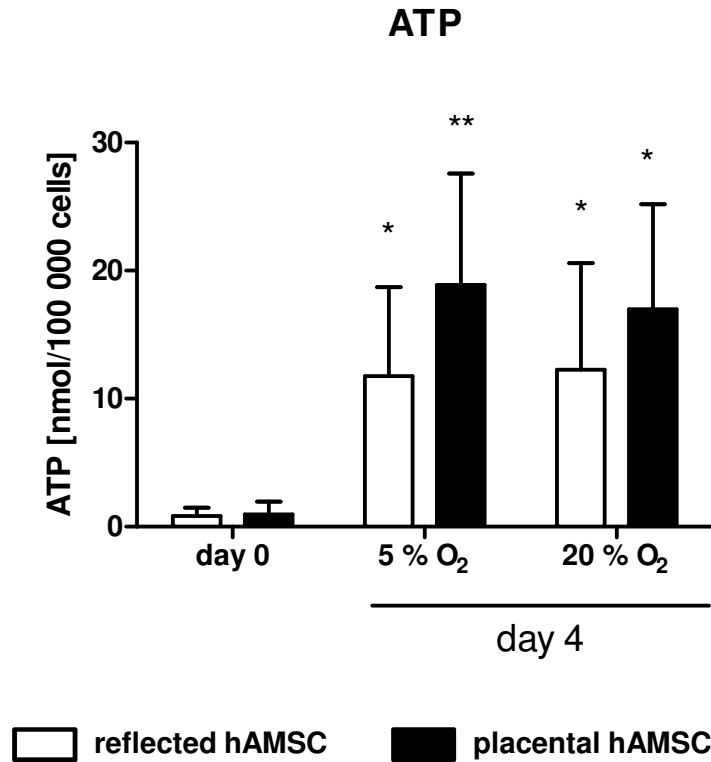

**Supplementary Figure 2. Adenosine triphosphate concentration (ATP).** ATP concentration was measured in 100 000 freshly isolated hAMSCs at day 0, and after 4 days incubation at 5 % and 20 % oxygen. The cells were homogenized and ATP was determined using luciferase reagent with Luminat LB 9507. n = 3-5 (biological replicates), mean  $\pm$  SD, \*p < 0.05 vs day 0. Abbreviations: hAMSCs, human amniotic mesenchymal stromal cells; O<sub>2</sub>, oxygen.
